# Supplementary material
Source: PubMed Central journal article supplement (PMC5065031)
Supplement: Supp_Table2.pdf [file Supp_Table2.pdf]

SUPPLEMENTARY TABLE S2. THE RATIO (MEDIAN%) OF LYMPHOCYTE SUBSETS TO THE PARENT CELL POPULATION AMONG PWID AND CONTROLS

| <i>Cell populations</i>                | <i>Triple negative PWID (n=11)</i> | <i>Controls</i>  | <i>p</i>         |
|----------------------------------------|------------------------------------|------------------|------------------|
| CD4 <sup>+</sup>                       | 58.6 (56.6–64.9)                   | 55.9 (49.5–63.3) | 0.150            |
| T <sub>N</sub>                         | 36.4 (33.5–52.9)                   | 32.2 (24.4–39.0) | 0.128            |
| T <sub>N</sub> HLA-DR <sup>+</sup>     | 1.5 (1.0–1.9)                      | 1.7 (1.0–2.3)    | 0.445            |
| T <sub>N</sub> CCR5 <sup>+</sup>       | 0.3 (0.1–1.1)                      | 0.3 (0.2–0.5)    | 0.606            |
| T <sub>CM</sub>                        | 44.0 (37.0–53.9)                   | 48.9 (40.8–54.5) | 0.625            |
| T <sub>CM</sub> HLA-DR <sup>+</sup>    | 4.9 (3.7–6.0)                      | 3.5 (2.7–4.0)    | <b>0.020</b>     |
| T <sub>CM</sub> CCR5 <sup>+</sup>      | 2.3 (1.3–2.6)                      | 1.3 (0.6–2.0)    | <b>0.020</b>     |
| T <sub>EM</sub>                        | 10.8 (8.9–15.4)                    | 16.4 (11.7–21.9) | <b>0.031</b>     |
| T <sub>EM</sub> HLA-DR <sup>+</sup>    | 23.2 (21.0–25.9)                   | 15.0 (11.3–18.8) | <b>&lt;0.001</b> |
| T <sub>EM</sub> CCR5 <sup>+</sup>      | 10.9 (8.2–12.6)                    | 8.0 (3.7–10.9)   | <b>0.044</b>     |
| T <sub>TEMRA</sub>                     | 0.5 (0.1–2.2)                      | 0.3 (0.2–0.8)    | 0.625            |
| T <sub>TEMRA</sub> HLA-DR <sup>+</sup> | 22.2 (16.9–37.5)                   | 11.1 (3.9–20.7)  | <b>0.016</b>     |
| T <sub>TEMRA</sub> CCR5 <sup>+</sup>   | 1.5 (0–8.7)                        | 0 (0–5.4)        | 0.102            |
| HLA-DR <sup>+</sup>                    | 5.4 (4.1–8.7)                      | 4.6 (3.8–5.4)    | 0.222            |
| CCR5 <sup>+</sup>                      | 2.4 (1.6–3.4)                      | 2.0 (1.0–2.9)    | 0.307            |
| CD8 <sup>+</sup>                       | 31.5 (25.6–34.1)                   | 32.3 (28.2–41.2) | 0.167            |
| T <sub>N</sub>                         | 25.8 (16.8–39.2)                   | 23.2 (13.5–35.7) | 0.639            |
| T <sub>N</sub> HLA-DR <sup>+</sup>     | 2.8 (1.1–3.8)                      | 2.4 (1.6–3.1)    | 0.653            |
| T <sub>N</sub> CCR5 <sup>+</sup>       | 0.7 (0.1–1.0)                      | 0.3 (0.1–0.6)    | 0.292            |
| T <sub>CM</sub>                        | 3.9 (3.1–5.4)                      | 2.4 (1.6–3.7)    | <b>0.017</b>     |
| T <sub>CM</sub> HLA-DR <sup>+</sup>    | 9.5 (5.3–12.9)                     | 7.2 (4.1–10.0)   | 0.219            |
| T <sub>CM</sub> CCR5 <sup>+</sup>      | 3.2 (2.3–8.7)                      | 1.8 (0–5.6)      | <b>0.036</b>     |
| T <sub>EM</sub>                        | 31.6 (27.4–40.3)                   | 43.2 (30.0–54.0) | 0.118            |
| T <sub>EM</sub> HLA-DR <sup>+</sup>    | 31.3 (23.5–38.6)                   | 18.6 (11.7–24.5) | <b>0.002</b>     |
| T <sub>EM</sub> CCR5 <sup>+</sup>      | 16.4 (14.5–24.0)                   | 15.8 (9.2–24.9)  | 0.399            |
| T <sub>TEMRA</sub>                     | 29.2 (24.3–35.9)                   | 27.1 (16.8–35.6) | 0.367            |
| T <sub>TEMRA</sub> HLA-DR <sup>+</sup> | 30.8 (18.9–42.3)                   | 13.0 (7.6–19.5)  | <b>&lt;0.001</b> |
| T <sub>TEMRA</sub> CCR5 <sup>+</sup>   | 4.4 (3.4–9.5)                      | 3.3 (1.2–6.1)    | 0.161            |
| HLA-DR <sup>+</sup>                    | 23.9 (15.2–27.9)                   | 10.5 (8.1–15.9)  | <b>0.002</b>     |
| CCR5 <sup>+</sup>                      | 8.7 (6.4–13.2)                     | 8.1 (4.1–11.2)   | 0.421            |

$p < 0.05$  was considered statistically significant and is marked in bold typeface.
